# Supplementary material for: Multi-task analysis of gene expression data on cancer public datasets
Source: bioRxiv or medRxiv preprint supplement (doi:10.1101/2023.09.27.23296213), 2023-09-28

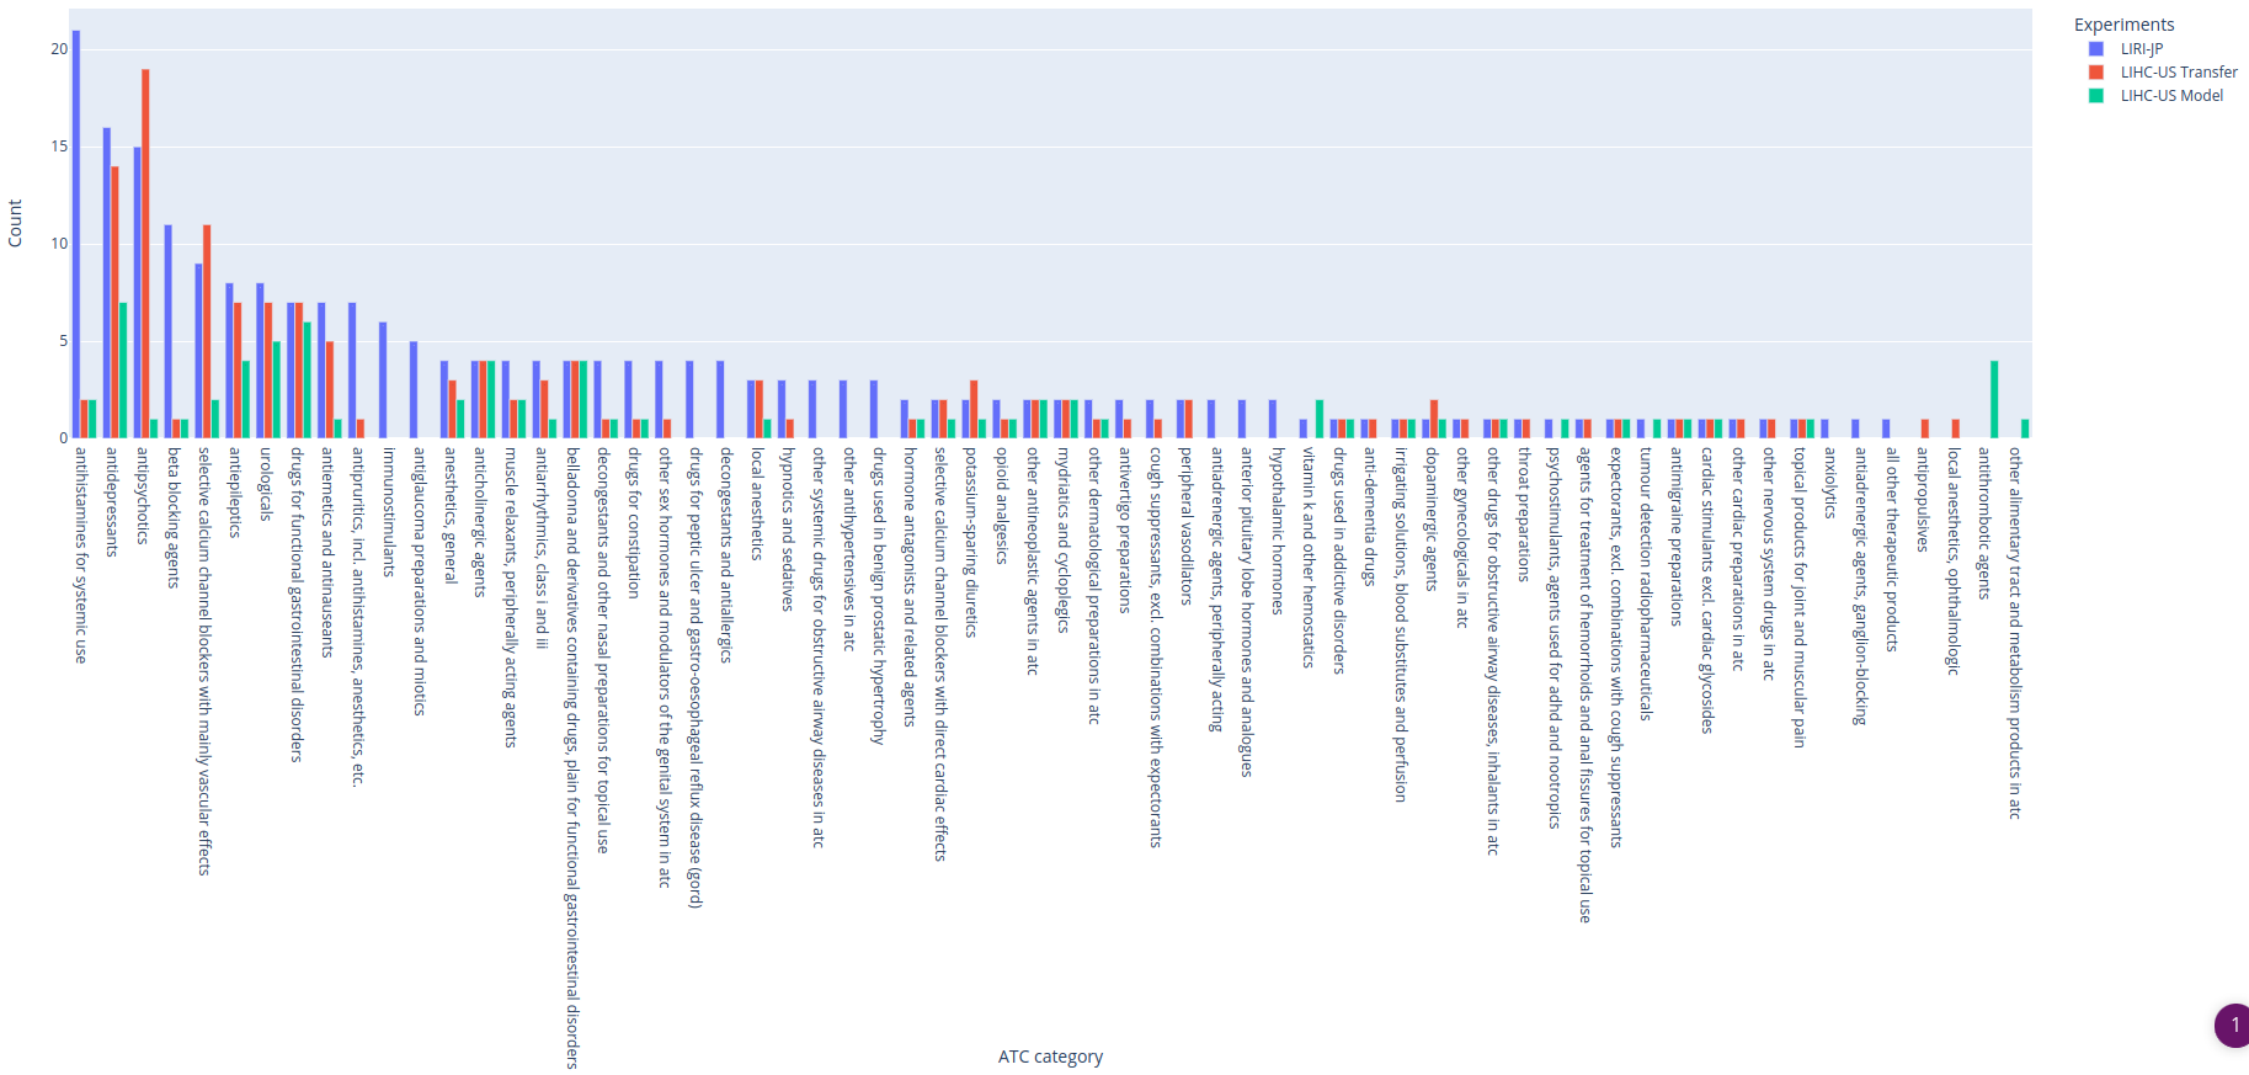

Supplement: Supplementary file [file media-1.pdf]
